# Supplementary material for: A gut-derived hormone suppresses sugar appetite and regulates food choice in Drosophila
Source: PubMed Central journal article supplement (PMC9684077; doi:10.1038/s42255-022-00672-z), 2022-11-07
Supplement: 42255_2022_672_MOESM1_ESM.pdf [file 42255_2022_672_MOESM1_ESM.pdf]

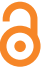

---

# **A gut-derived hormone suppresses sugar appetite and regulates food choice in *Drosophila***

---

In the format provided by the authors and unedited

---

**Supplementary Table 1: Fly lines used in this work**

| Fly line                                                                                      | Stock number | Source                                                                   |
|-----------------------------------------------------------------------------------------------|--------------|--------------------------------------------------------------------------|
| <i>10xUAS-IVS-myr::tdTomato[su(Hw)attP8]; CaLexA</i>                                          | n/a          | this work                                                                |
| <i>AKH<sup>ts</sup>&gt; (Tub-GAL80<sup>TS</sup>; AKH-GAL4)</i>                                | n/a          | this work                                                                |
| <i>AstC<sup>gut</sup>&gt; (R57C10-GAL80; AstC::2A::GAL4)</i>                                  | n/a          | this work                                                                |
| <i>EEC&gt; (Tub-GAL80<sup>TS</sup> <i>voilà</i>-GAL4 recombined on III)</i>                   | n/a          | this work                                                                |
| <i>NPF<sup>gut</sup>&gt; (R57C10-GAL80; NPF::2A::GAL4)</i>                                    | n/a          | this work                                                                |
|                                                                                               |              |                                                                          |
| <i>10xUAS-IVS-myr::tdTomato[su(Hw)attP8]</i>                                                  | 32223        | Bloomington <i>Drosophila</i> Stock Center, University of Indiana (BDSC) |
| <i>AKH<sup>-/-</sup></i>                                                                      | n/a          | S. Kondo, Tokyo University of Science                                    |
| <i>AKH-GAL4</i>                                                                               | 25684        | BDSC                                                                     |
| <i>AstC::2A::GAL4</i>                                                                         | 845958       | BDSC                                                                     |
| <i>CaLexA (LexAop-CD8::GFP::2A::CD8::GFP; UAS-LexA::VP16::NFAT, LexAop-CD2::GFP/TM6B, Tb)</i> | 66542        | BDSC                                                                     |
| <i>Cg-GAL4</i>                                                                                | 7011         | BDSC                                                                     |
| <i>da-GAL4</i>                                                                                | 55850        | BDSC                                                                     |
| <i>Df(3L)delta130</i>                                                                         | n/a          | A. von Philipsborn, Aarhus University                                    |
| <i>elav-GAL4</i>                                                                              | 458          | BDSC                                                                     |
| <i>NPF::2A::GAL4</i>                                                                          | 84671        | BDSC                                                                     |
| <i>NPFR::T2A::GAL4</i>                                                                        | n/a          | S. Kondo, Tokyo University of Science                                    |
| <i>R57C10-GAL80-6 (on X)</i>                                                                  | n/a          | R. Niwa, University of Tsukuba                                           |
| <i>SP<sup>0</sup></i>                                                                         | 77892        | BDSC                                                                     |
| <i>Tub-GAL80<sup>TS</sup></i>                                                                 | 7108         | BDSC                                                                     |
| <i>UAS-AKH-RNAi</i>                                                                           | 105063       | Vienna <i>Drosophila</i> Resource Center (VDRC)                          |
| <i>UAS-LexA::VP16::NFAT; LexAop-Luciferase</i>                                                | n/a          | M. Rosbash, Brandeis University                                          |
| <i>UAS-mCD8::GFP</i>                                                                          | 5137         | BDSC                                                                     |
| <i>UAS-Mondo-RNAi</i>                                                                         | 109821       | VDRC                                                                     |
| <i>UAS-NPF-RNA<sup>KK</sup></i>                                                               | 108772       | VDRC                                                                     |
| <i>UAS-NPF-RNA<sup>ph</sup></i>                                                               | 330277       | VDRC                                                                     |
| <i>UAS-NPF-RNA<sup>TRIP</sup></i>                                                             | 27237        | BDSC                                                                     |
| <i>UAS-NPFR-RNA<sup>GD</sup></i>                                                              | 9605         | VDRC                                                                     |
| <i>UAS-NPFR-RNA<sup>TRIP</sup></i>                                                            | 25939        | BDSC                                                                     |
| <i>UAS-SPR-RNAi</i>                                                                           | 106804       | VDRC                                                                     |
| <i>UAS-sut1-RNAi</i>                                                                          | 65964        | BDSC                                                                     |
| <i>UAS-sut2-RNAi</i>                                                                          | 102028       | VDRC                                                                     |
| <i>UAS-TrpA1</i>                                                                              | 26263        | BDSC                                                                     |
| <i>UAS-TrpA1[attP2]</i>                                                                       | n/a          | C. Wegener, University of Würzburg                                       |
| <i>voilà-GAL4</i>                                                                             | n/a          | A. Scopelliti, University of Glasgow                                     |
| <i>w<sup>1118</sup></i>                                                                       | 60000        | VDRC                                                                     |

**Supplementary Table 2: Oligo sequences used for qPCR**

| <b>Primer name</b>                       |
|------------------------------------------|
| <i>Rp49</i> -F: AGTATCTGATGCCCAACATCG    |
| <i>Rp49</i> -R: CAATCTCCTTGCGCTTCTTG     |
| <i>sut2</i> -F: AGCATCGTTCCATCGCCATG     |
| <i>sut2</i> -R: CATCAGAAGCGGGGICCATC     |
| <i>NPF</i> -F: TGCAGTGTTGACATCGTTCTTTTCG |
| <i>NPF</i> -R: AAACCGAAAGAACGATGTCAACAC  |
| <i>AstC</i> -F: TACGGCCTACTCCTCACCC      |
| <i>AstC</i> -R: GCTGGCATATTCGTAGCCACC    |
