# Supplementary material for: A gut-derived hormone suppresses sugar appetite and regulates food choice in Drosophila
Source: PubMed Central journal article supplement (PMC9684077; doi:10.1038/s42255-022-00672-z), 2022-11-07
Supplement: 42255_2022_672_MOESM2_ESM.pdf [file 42255_2022_672_MOESM2_ESM.pdf]

## Reporting Summary

Nature Portfolio wishes to improve the reproducibility of the work that we publish. This form provides structure for consistency and transparency in reporting. For further information on Nature Portfolio policies, see our [Editorial Policies](#) and the [Editorial Policy Checklist](#).

### Statistics

For all statistical analyses, confirm that the following items are present in the figure legend, table legend, main text, or Methods section.

n/a Confirmed

- The exact sample size ( $n$ ) for each experimental group/condition, given as a discrete number and unit of measurement
- A statement on whether measurements were taken from distinct samples or whether the same sample was measured repeatedly
- The statistical test(s) used AND whether they are one- or two-sided  
*Only common tests should be described solely by name; describe more complex techniques in the Methods section.*
- A description of all covariates tested
- A description of any assumptions or corrections, such as tests of normality and adjustment for multiple comparisons
- A full description of the statistical parameters including central tendency (e.g. means) or other basic estimates (e.g. regression coefficient) AND variation (e.g. standard deviation) or associated estimates of uncertainty (e.g. confidence intervals)
- For null hypothesis testing, the test statistic (e.g.  $F$ ,  $t$ ,  $r$ ) with confidence intervals, effect sizes, degrees of freedom and  $P$  value noted  
*Give  $P$  values as exact values whenever suitable.*
- For Bayesian analysis, information on the choice of priors and Markov chain Monte Carlo settings
- For hierarchical and complex designs, identification of the appropriate level for tests and full reporting of outcomes
- Estimates of effect sizes (e.g. Cohen's  $d$ , Pearson's  $r$ ), indicating how they were calculated

*Our web collection on [statistics for biologists](#) contains articles on many of the points above.*

### Software and code

Policy information about [availability of computer code](#)

Data collection

Data analysis

For manuscripts utilizing custom algorithms or software that are central to the research but not yet described in published literature, software must be made available to editors and reviewers. We strongly encourage code deposition in a community repository (e.g. GitHub). See the Nature Portfolio [guidelines for submitting code & software](#) for further information.

## Data

Policy information about [availability of data](#)

All manuscripts must include a [data availability statement](#). This statement should provide the following information, where applicable:

- Accession codes, unique identifiers, or web links for publicly available datasets
- A description of any restrictions on data availability
- For clinical datasets or third party data, please ensure that the statement adheres to our [policy](#)

All data generated or analyzed during this study are available as Source Data files. Source data are provided with the paper.

## Human research participants

Policy information about [studies involving human research participants and Sex and Gender in Research](#).

|                             |                                                                                                          |
|-----------------------------|----------------------------------------------------------------------------------------------------------|
| Reporting on sex and gender | No human studies were performed.                                                                         |
| Population characteristics  | No human studies were performed.                                                                         |
| Recruitment                 | No human studies were performed.                                                                         |
| Ethics oversight            | No human studies were performed. Ethical approval and oversight are not required for Drosophila studies. |

Note that full information on the approval of the study protocol must also be provided in the manuscript.

## Field-specific reporting

Please select the one below that is the best fit for your research. If you are not sure, read the appropriate sections before making your selection.

- Life sciences     Behavioural & social sciences     Ecological, evolutionary & environmental sciences

For a reference copy of the document with all sections, see [nature.com/documents/nr-reporting-summary-flat.pdf](https://www.nature.com/documents/nr-reporting-summary-flat.pdf)

## Life sciences study design

All studies must disclose on these points even when the disclosure is negative.

|                 |                                                                                                                                                                                                                                                                                                                                                                                                                                                                                                                                                                                                                                                                                                                                                                                                                                               |
|-----------------|-----------------------------------------------------------------------------------------------------------------------------------------------------------------------------------------------------------------------------------------------------------------------------------------------------------------------------------------------------------------------------------------------------------------------------------------------------------------------------------------------------------------------------------------------------------------------------------------------------------------------------------------------------------------------------------------------------------------------------------------------------------------------------------------------------------------------------------------------|
| Sample size     | Sample size was chosen based on similar previously published studies of Drosophila behavior and metabolism (doi.org:10.1038/s41467-022-28268-x, doi.org:10.1016/j.cmet.2018.09.021, doi.org:10.1038/s42255-020-0266-x, doi.org:10.1371/journal.pbio.2005004). No sample-size calculations were performed. The numbers of samples are large enough to capture normal variation while maintaining feasibility for preparation and are similar to or larger than those used in other published studies in the field. qPCR used 5-8 samples, each containing several tissues or animals, the standard in our lab; starvation and metabolic assays used approximately 10 replicates containing multiple animals. Image analyses made use of multiple tissues per genotype or condition, as described in the appropriate figure legends or methods. |
| Data exclusions | No data were excluded.                                                                                                                                                                                                                                                                                                                                                                                                                                                                                                                                                                                                                                                                                                                                                                                                                        |
| Replication     | Representative images were chosen from multiple options, generally at least 6. All experiments producing numerical data include at least 5 replicates. All attempts at replication were successful.                                                                                                                                                                                                                                                                                                                                                                                                                                                                                                                                                                                                                                           |
| Randomization   | Animals were randomly grouped into batches as indicated in the text                                                                                                                                                                                                                                                                                                                                                                                                                                                                                                                                                                                                                                                                                                                                                                           |
| Blinding        | Researchers were not blinded during the study because this is not generally done in fly studies. With limited staff with expertise in these particular studies, the person handling sample prep must usually also be the one performing the assay.                                                                                                                                                                                                                                                                                                                                                                                                                                                                                                                                                                                            |

## Reporting for specific materials, systems and methods

We require information from authors about some types of materials, experimental systems and methods used in many studies. Here, indicate whether each material, system or method listed is relevant to your study. If you are not sure if a list item applies to your research, read the appropriate section before selecting a response.

## Materials &amp; experimental systems

| n/a                                 | Involvement                                                     |
|-------------------------------------|-----------------------------------------------------------------|
| <input type="checkbox"/>            | <input checked="" type="checkbox"/> Antibodies                  |
| <input checked="" type="checkbox"/> | <input type="checkbox"/> Eukaryotic cell lines                  |
| <input checked="" type="checkbox"/> | <input type="checkbox"/> Palaeontology and archaeology          |
| <input type="checkbox"/>            | <input checked="" type="checkbox"/> Animals and other organisms |
| <input checked="" type="checkbox"/> | <input type="checkbox"/> Clinical data                          |
| <input checked="" type="checkbox"/> | <input type="checkbox"/> Dual use research of concern           |

## Methods

| n/a                                 | Involvement                                     |
|-------------------------------------|-------------------------------------------------|
| <input checked="" type="checkbox"/> | <input type="checkbox"/> ChIP-seq               |
| <input checked="" type="checkbox"/> | <input type="checkbox"/> Flow cytometry         |
| <input checked="" type="checkbox"/> | <input type="checkbox"/> MRI-based neuroimaging |

## Antibodies

## Antibodies used

Rabbit anti-AKH, obtained from Jae Park (University of Tennessee), 1:500.  
 Rabbit anti-Allatostatin C (AstC), made by Jan Veenstra (University of Bordeaux), 1:500.  
 Mouse anti-GFP, ThermoFisher #A11120, 1:500.  
 Rat anti-mCherry, ThermoFisher #M11217, 1:2000.  
 Rabbit anti-NPF, RayBioTech #RB-19-0001-20, 1:500.  
 Mouse anti-Prospero, Developmental Studies Hybridoma Bank (University of Iowa) #MR1A, 1:20.  
 Alexa Fluor 488 goat anti-mouse, ThermoFisher #A32723, 1:500.  
 Alexa Fluor 555 goat anti-rabbit, ThermoFisher #A32732, 1:500.  
 Alexa Fluor 405 goat anti-rabbit, ThermoFisher #A31556, 1:500.  
 Alexa Fluor 555 goat anti-rat, ThermoFisher #A21434, 1:500.

## Validation

Anti-AKH validated in Lee G and Park JH. (2004). Hemolymph sugar homeostasis and starvation-induced hyperactivity affected by genetic manipulations of the adipokinetic hormone-encoding gene in *Drosophila melanogaster*. *Genetics* 167, 311-323.

Anti-AstC validated in Veenstra JA, Agricola HJ, and Sellami A. (2008). Regulatory peptides in fruit fly midgut. *Cell Tissue Res* 334, 499-516.

Anti-NPF: valid for *Drosophila* according to sales page (<https://www.raybiotech.com/rabbit-anti-npf-en/>) and previous studies, e.g., "The Nutrient-Responsive Hormone CCHamide-2 Controls Growth by Regulating Insulin-like Peptides in the Brain of *Drosophila melanogaster*", Sano H et al., *PLOS Genetics*, May 28, 2015; "Developmental Ethanol Exposure Causes Reduced Feeding and Reveals a Critical Role for Neuropeptide F in Survival", Guevara A et al., *Frontiers in Physiology*, March 22, 2018.

Anti-GFP validated for staining by manufacturer (<https://www.thermofisher.com/antibody/product/GFP-Antibody-clone-3E6-Monoclonal/A-11120>).

Anti-mCherry validated for staining by manufacturer (<https://www.thermofisher.com/antibody/product/mCherry-Antibody-clone-16D7-Monoclonal/M11217>).

Anti-Prospero validated in "RK2, a glial-specific homeodomain protein required for embryonic nerve cord condensation and viability in *Drosophila*." Tomlinson A. *Development (Cambridge, England)* 120.10 (1994 Oct): 2957-66.

Goat anti-mouse, Alexa Fluor 488, validated by manufacturer (<https://www.thermofisher.com/antibody/product/Goat-anti-Mouse-IgG-H-L-Highly-Cross-Adsorbed-Secondary-Antibody-Polyclonal/A32723>).

Goat anti-rabbit, Alexa Fluor 555, validated by manufacturer (<https://www.thermofisher.com/antibody/product/Goat-anti-Rabbit-IgG-H-L-Highly-Cross-Adsorbed-Secondary-Antibody-Polyclonal/A32732>).

Goat anti-rabbit, Alexa Fluor 405, validated by manufacturer (<https://www.thermofisher.com/antibody/product/Goat-anti-Rabbit-IgG-H-L-Cross-Adsorbed-Secondary-Antibody-Polyclonal/A-31556>).

Goat anti-rat, Alexa Fluor 555, validated by manufacturer (<https://www.thermofisher.com/antibody/product/Goat-anti-Rat-IgG-H-L-Cross-Adsorbed-Secondary-Antibody-Polyclonal/A-21434>).

## Animals and other research organisms

Policy information about [studies involving animals](#); [ARRIVE guidelines](#) recommended for reporting animal research, and [Sex and Gender in Research](#)

## Laboratory animals

This study made use of a variety of stocks of *Drosophila melanogaster*, detailed in the manuscript and Supplementary Table 2. Most experiments examined female adults (5+ days after eclosion), with a few experiments including males as well.

## Stocks created for this work:

10xUAS-IVS-myr::tdTomato[su(Hw)attP8]; CaLexA  
 AKH[ts]> (Tub-GAL80[TS]; AKH-GAL4)

AstC[*gut*] > (R57C10-GAL80; AstC::2A::GAL4)  
 EEC > (Tub-GAL80[TS]; *voilà*-GAL4)  
 NPF[*gut*] > (R57C10-GAL80; NPF::2A::GAL4)

Stocks obtained from Bloomington Drosophila Stock Center:

AKH-GAL4, #25684  
 AstC::2A::GAL4, #84595  
 CaLexA (LexAop-CD8::GFP::2A::CD8::GFP; UAS-LexA::VP16::NFAT, LexAop-CD2::GFP/TM6B, Tb), #66542  
 Cg-GAL4, #7011  
 da-GAL4, #55850  
 elav-GAL4, #458  
 NPF::2A::GAL4, #84671  
 SP[0], #77892  
 Tub-GAL80[TS], #7108  
 UAS-mCD8::GFP, #5137  
 UAS-NPF-RNAi[TRiP], #27237  
 UAS-NPFR-RNAi[TRiP], #25939  
 UAS-sut1-RNAi, #65964  
 UAS-TrpA1, #26263

Stocks obtained from Vienna Drosophila Resource Center:

UAS-AKH-RNAi, #105063  
 UAS-Mondo-RNAi, #109821  
 UAS-NPF-RNAi[KK], #108772  
 UAS-NPF-RNAi[sh], #330277  
 UAS-NPFR-RNAi[GD], #9605  
 UAS-SPR-RNAi, #106804  
 UAS-sut2-RNAi, #102028  
 w[1118], #60000

Others:

AKH[-] – gift of S. Kondo, Tokyo University of Science.  
 Df(3L)delta130 -- gift of A. von Philipsborn, Aarhus University.  
 NPFR::T2A::GAL4 -- gift of S. Kondo, Tokyo University of Science.  
 R57C10-GAL80-6 (on X) – gift of R. Niwa, University of Tsukuba.  
 UAS-TrpA1[attP2] -- gift of C. Wegener, University of Würzburg.  
 UAS-LexA::VP16::NFAT; LexAop-Luciferase – gift of M. Rosbash, Brandeis University.  
*voilà*-GAL4 – gift of A. Scopelliti, University of Glasgow.

|                         |                                                                                                                                                                                                                                                                                                                                                                                                |
|-------------------------|------------------------------------------------------------------------------------------------------------------------------------------------------------------------------------------------------------------------------------------------------------------------------------------------------------------------------------------------------------------------------------------------|
| Wild animals            | No wild animals were used in this study.                                                                                                                                                                                                                                                                                                                                                       |
| Reporting on sex        | Our study identifies a hormonal pathway that appears to function differently in male and female <i>Drosophila</i> . Most experiments were performed with female animals, to study the female-specific function of the system. A few experiments were performed in males, which showed that the system functions differently in these animals, but no detailed followup was performed in males. |
| Field-collected samples | No field-collected animals were used in this study.                                                                                                                                                                                                                                                                                                                                            |
| Ethics oversight        | No ethics approval or oversight is required for <i>Drosophila</i> studies.                                                                                                                                                                                                                                                                                                                     |

Note that full information on the approval of the study protocol must also be provided in the manuscript.
